# Supplementary material for: Thermochemical energy storage in barium carbonate enhanced by iron(iii) oxide
Source: Royal Society of Chemistry journal article supplement (doi:10.1039/d2cp05745j), 2023-01-01
Supplement: d2cp05745j1.pdf [file d2cp05745j1.pdf]

Supplementary Information:

**Thermochemical Energy Storage in Barium Carbonate Enhanced by Iron (III) Oxide**

Kyran Williamson,<sup>1\*</sup> Kasper T. Møller,<sup>1,2</sup> Anita M. D'Angelo,<sup>3</sup> Terry D. Humphries,<sup>1</sup> Mark Paskevicius,<sup>1\*</sup> Craig E. Buckley,<sup>1</sup>

<sup>1</sup>Physics and Astronomy, Curtin University, GPO Box U1987, Perth, WA 6845, Australia.

<sup>2</sup>Department of Biological and Chemical Engineering, Aarhus University, Aabogade 40, Aarhus, DK-8200, Denmark.

<sup>3</sup>Australian Synchrotron, 800 Blackburn Rd, Clayton, VIC 3168, Australia

\*Corresponding Authors:

Kyran Williamson, [kyran.williamson@postgrad.curtin.edu.au](mailto:kyran.williamson@postgrad.curtin.edu.au) and Mark Paskevicius, [m.paskevicius@curtin.edu.au](mailto:m.paskevicius@curtin.edu.au)

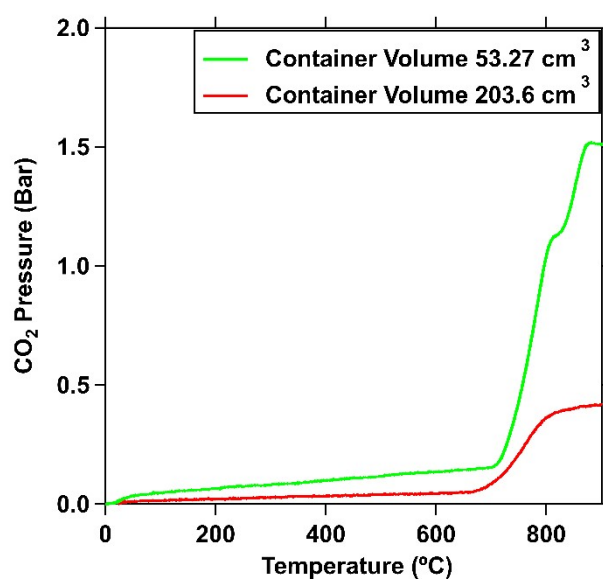

**Figure S1:** ~ 1 g of BaCO<sub>3</sub>-Fe<sub>2</sub>O<sub>3</sub> heated from room temperature to 900 °C.  $\Delta T/\Delta t = 10$  °C min<sup>-1</sup>) using a sealed volume in a Sieverts apparatus at  $p_{\text{initial}}(\text{CO}_2) = 10^{-2}$  bar: using a volume of either 53.27 cm<sup>3</sup> (green curve) or 203.6 cm<sup>3</sup> (red curve), which influences the CO<sub>2</sub> pressure achieved during decomposition of the BaCO<sub>3</sub>-Fe<sub>2</sub>O<sub>3</sub> RCC.

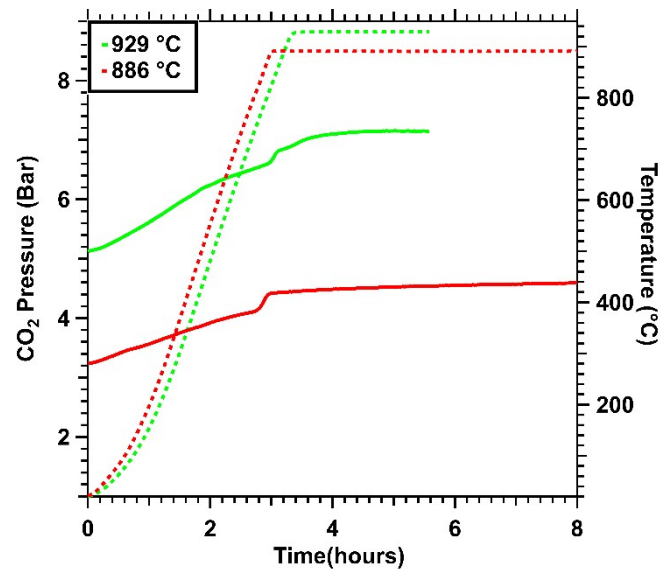

**Figure S2:** ~ 1 g of BaCO<sub>3</sub>-Fe<sub>2</sub>O<sub>3</sub> heated from room temperature to 900 °C.  $\Delta T/\Delta t = 10 \text{ }^\circ\text{C min}^{-1}$  in a sealed volume (53.27 cm<sup>3</sup>) using Sieverts apparatus. Dashed curve represents the temperature and solid curve represents the pressure.
